# Supplementary material for: Size controlled synthesis of carbon quantum dots using hydride reducing agents
Source: Royal Society of Chemistry journal article supplement (doi:10.1039/c4tc00826j), 2014-01-01
Supplement: c4tc00826j1.pdf [file c4tc00826j1.pdf]

# Size controlled synthesis of carbon quantum dots using hydride reducing agents

*Keith Linehan and Hugh Doyle\**

Tyndall National Institute, University College Cork, Lee Maltings, Cork, Ireland.

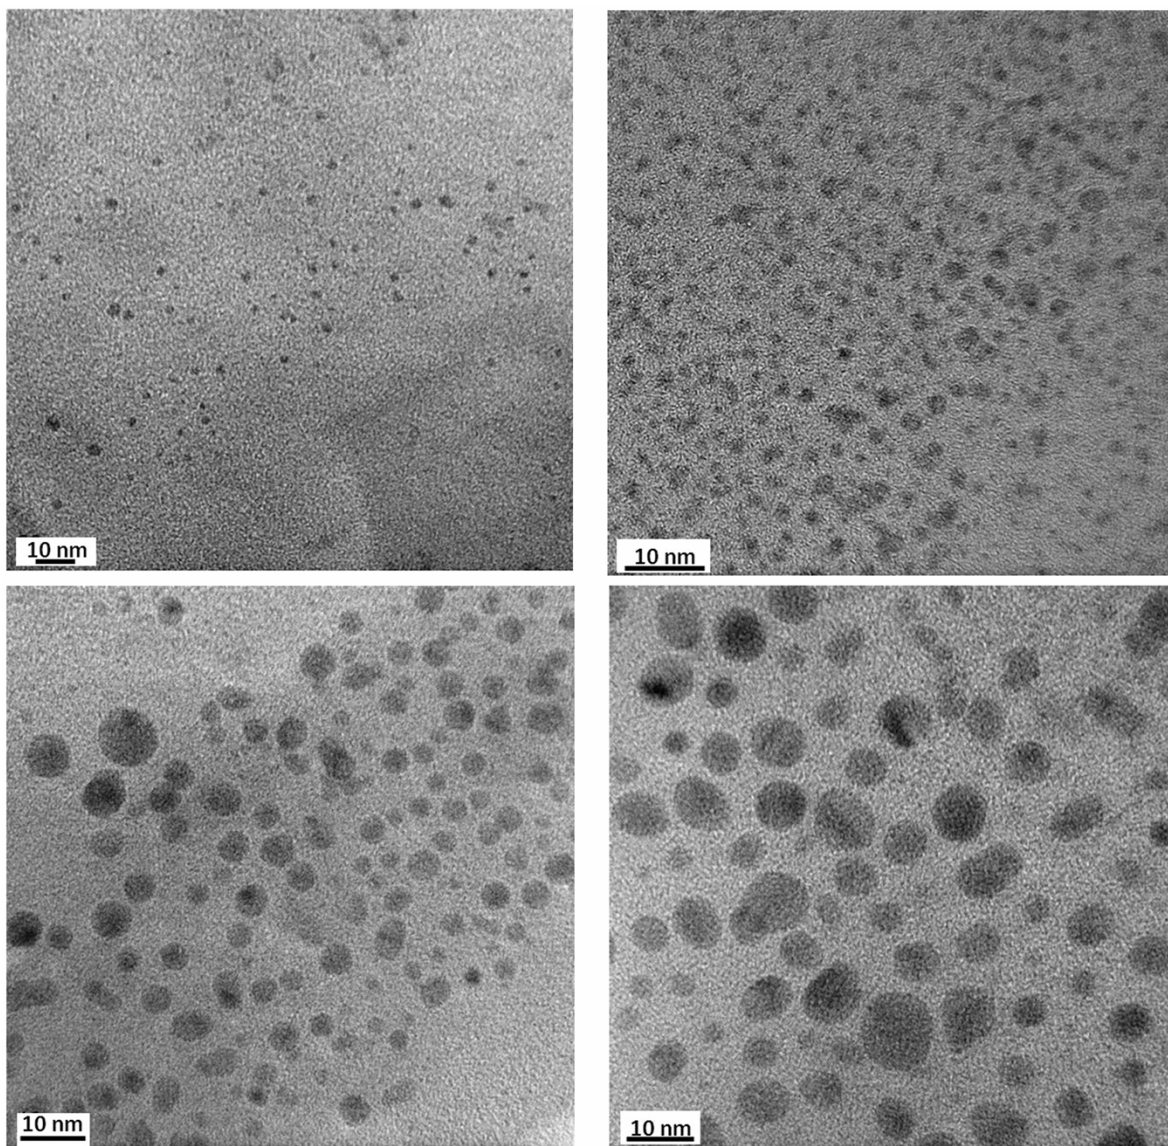

**Fig. S1** Low magnification TEM images of the CQDs.

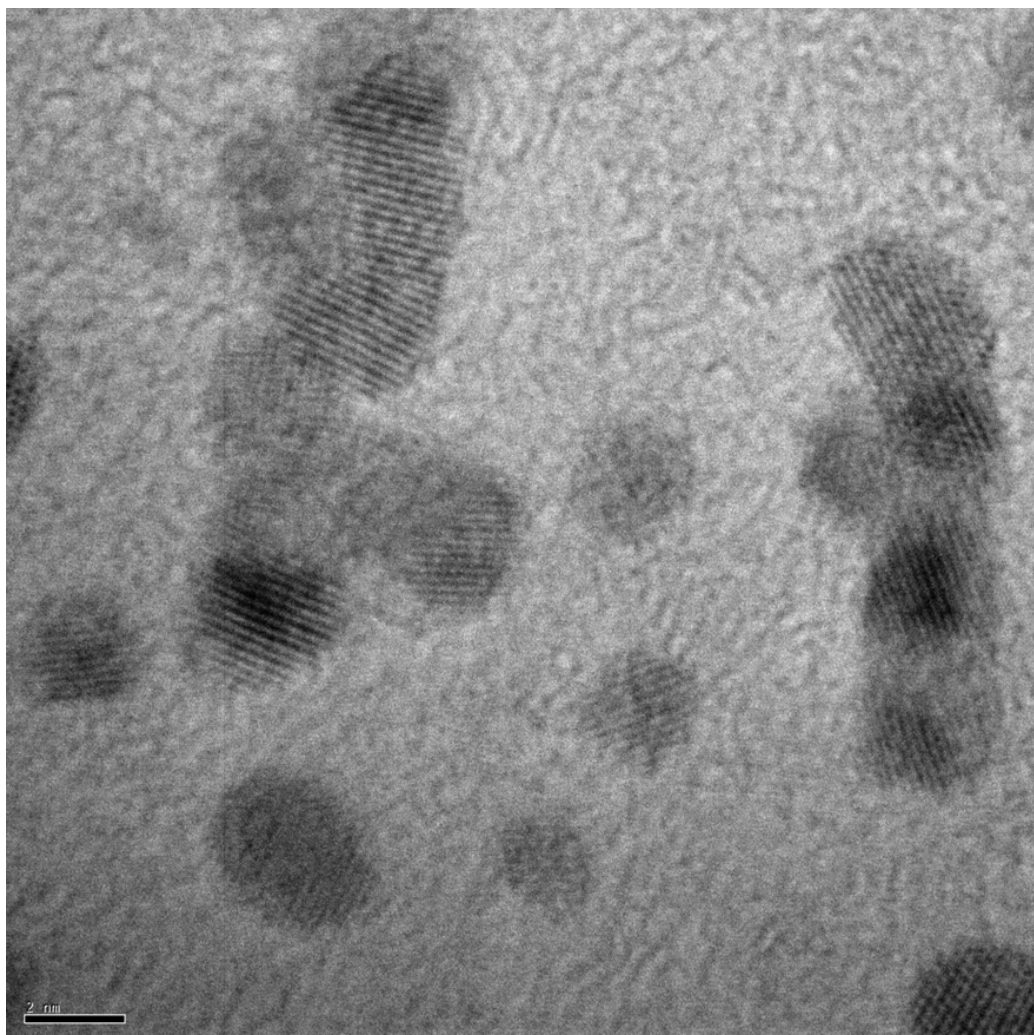

**Fig. S2** High resolution TEM image of the CQDs synthesised in the presence of lithium borohydride.

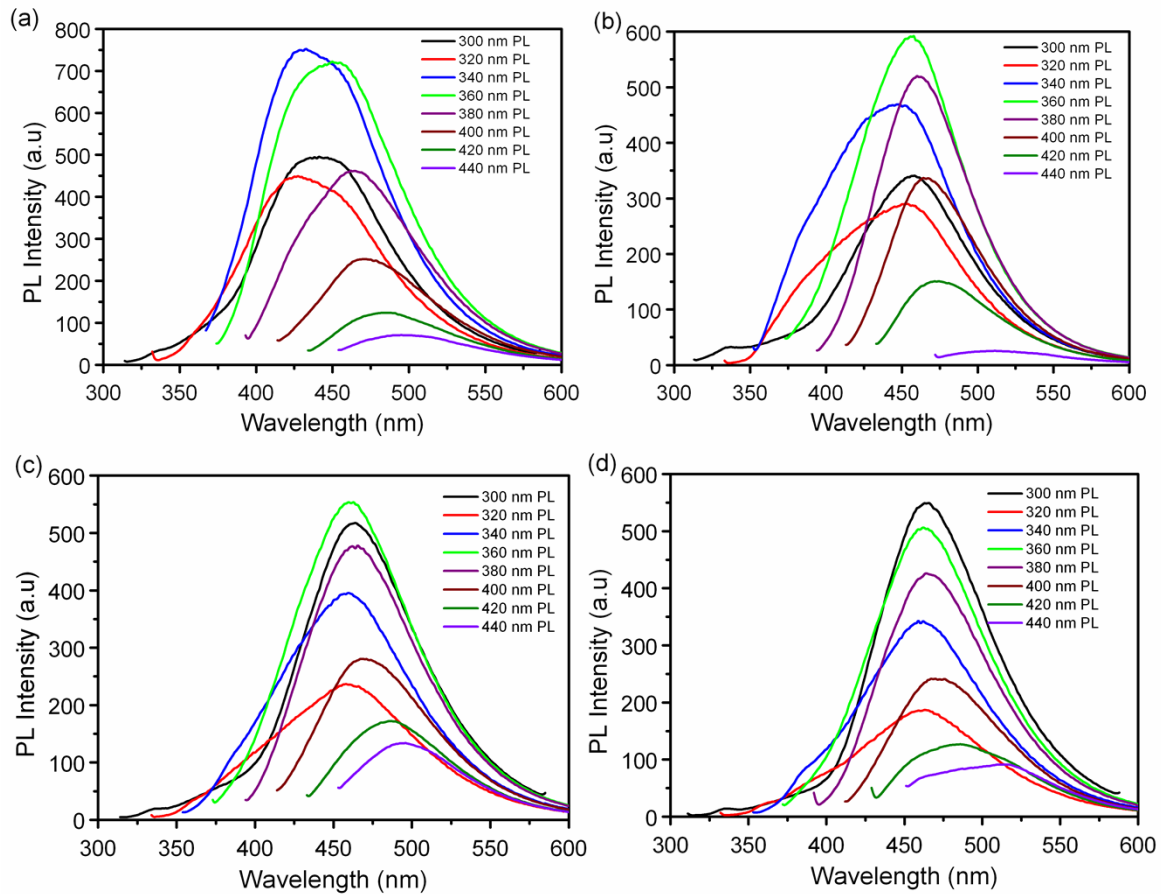

**Fig. S3** Photoluminescence spectra of the amine terminated carbon quantum dots synthesised using the different hydride reducing agents a) lithium aluminium hydride, b) Superhydride, c) L-Selectride, and d) lithium borohydride in water.

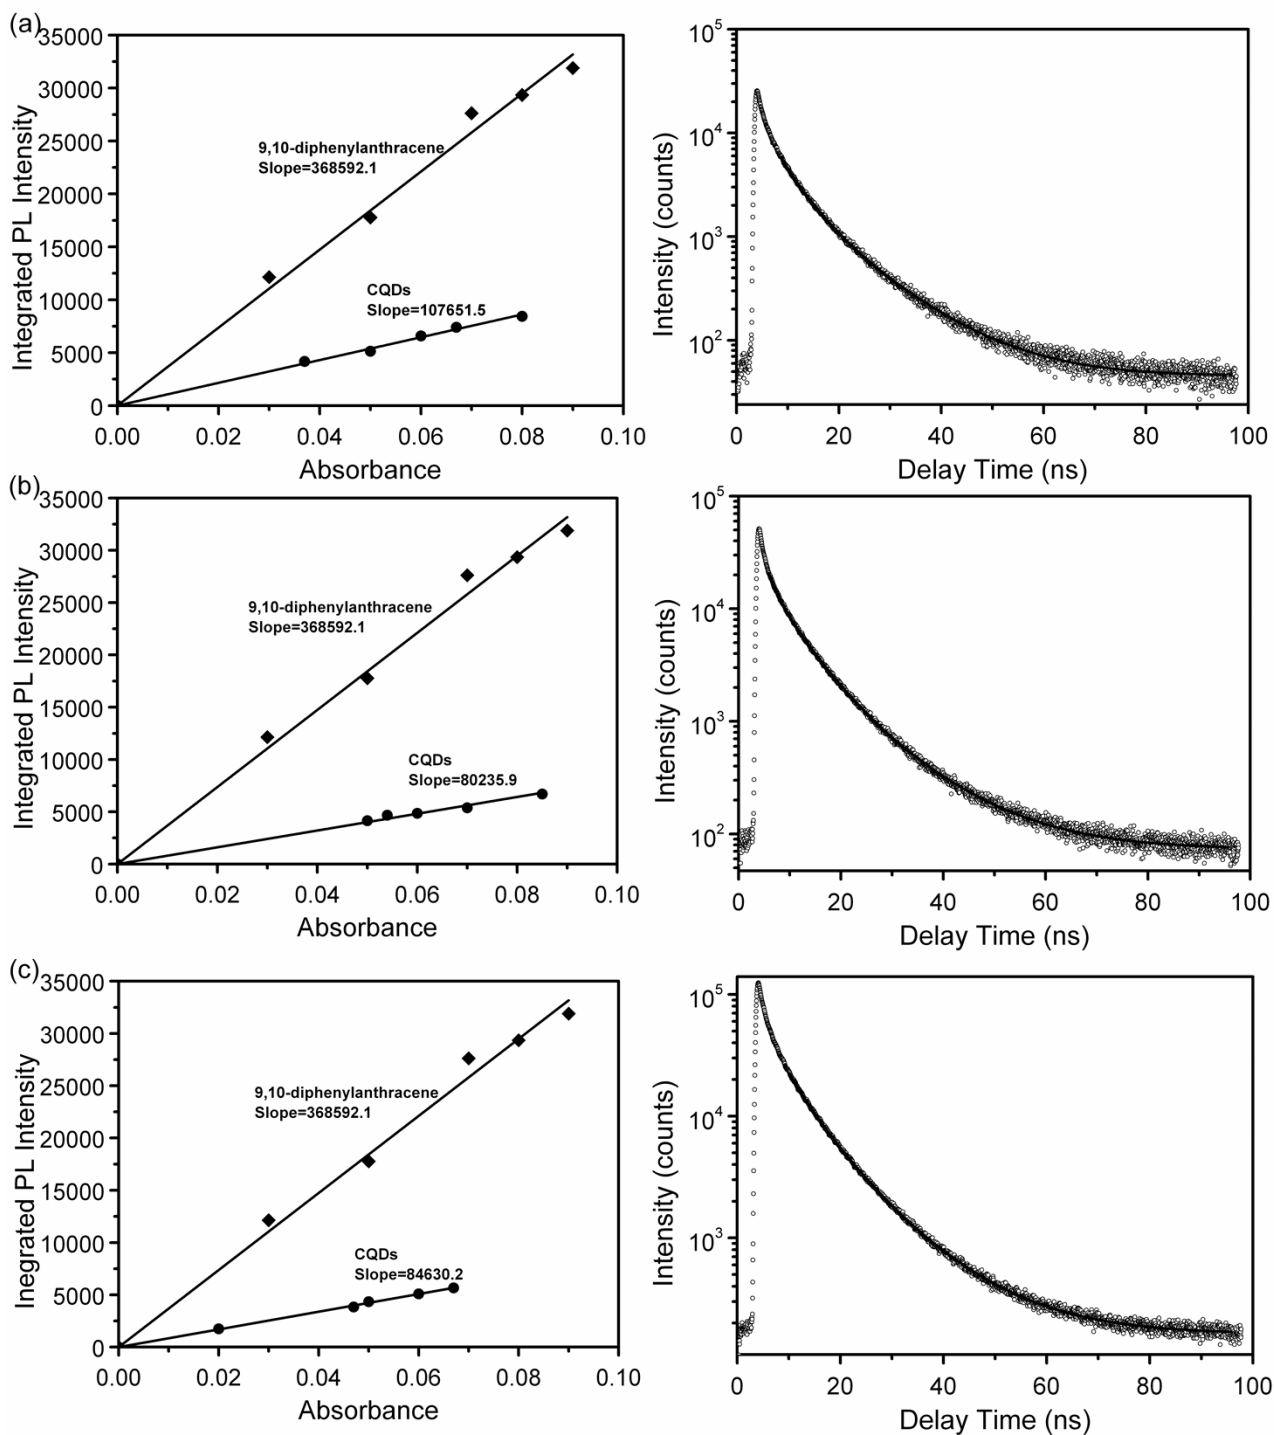

**Fig S4.** Integrated PL intensity versus absorbance, and corresponding time resolved PL spectra, of dilute aqueous dispersions of CQDs synthesized using a) Superhydride, b) L-Selectride, and c) lithium borohydride.
